# Supplementary material for: Genome-Wide Identification of WRKY Genes and Their Responses to Chilling Stress in Kandelia obovata
Source: Front Genet. 2022 Mar 31;13:875316. doi: 10.3389/fgene.2022.875316 (PMC9008847; doi:10.3389/fgene.2022.875316)
Supplement: Supplementary file 3 [file Table2.XLS]

## Sheet: Cis-acting elements 
	Supplementary Table S2. Cis-acting elements in the promoter regions of KoWRKYs
Gene Name	Gene ID	Motifs related to plant growth and development									motifs related to stress response
		Box 4	G-box	Sp1	ACE	GT1-motif	CCGTCC-box	CAT-box	GCN4-motif	Circadian	ERE	ABRE	CGTCA-motif	TGACG-motif	GARE-motif	TATC-box	P-box	TCA-element	SARE	MBS	LTR	DRE core	WUN-motif	TGA-element	AuxRR-core	ARE	TC-rich repeats
		light responsive	light responsive	light responsive	light responsive	light responsive	meristem specific activation	meristem expression	endosperm expression	circadian control	Ethylene-responsive element	ABA response	MeJA response	MeJA response	Gibberellin-responsive	Gibberellin-responsive	Gibberellin-responsive	Heat stress/SA responsive	SA responsiveness	Drought stress	Low-temperature stress	cold- and dehydration-responsiveness	Wound-responsive element	Auxin-responsive	Auxin-responsive	Anaerobic induction	Defense and stress
KoWRKY1	GWHGACBH000028	√	√	√		√		√		√	√	√	√	√		√	√			√	√		√			√
KoWRKY2	GWHGACBH000887	√	√								√	√	√	√						√							√
KoWRKY3	GWHGACBH001429		√						√			√	√	√		√	√	√		√	√					√
KoWRKY4	GWHGACBH001604	√	√					√			√	√			√		√	√			√	√
KoWRKY5	GWHGACBH002143	√	√								√	√		√							√		√			√
KoWRKY6	GWHGACBH002442	√	√					√			√	√		√										√		√	√
KoWRKY7	GWHGACBH002459	√	√								√	√	√	√							√		√			√
KoWRKY8	GWHGACBH002730										√		√	√	√								√	√		√
KoWRKY9	GWHGACBH002784	√	√								√	√	√	√				√		√			√			√	√
KoWRKY10	GWHGACBH002876	√	√	√	√						√	√	√	√			√	√		√			√			√
KoWRKY11	GWHGACBH003097	√	√			√	√				√	√	√	√			√	√						√		√
KoWRKY12	GWHGACBH004007	√	√								√	√	√	√				√					√	√		√	√
KoWRKY13	GWHGACBH004049		√	√	√							√	√	√			√	√	√	√	√					√
KoWRKY14	GWHGACBH004052	√	√					√		√	√	√	√	√				√			√	√	√	√		√
KoWRKY15	GWHGACBH004948	√	√			√		√			√	√			√	√		√		√	√					√	√
KoWRKY16	GWHGACBH005530		√		√	√	√					√	√	√	√					√	√
KoWRKY17	GWHGACBH005786	√		√		√					√	√	√	√			√			√		√		√		√
KoWRKY18	GWHGACBH005967	√			√	√		√			√		√	√				√								√	√
KoWRKY19	GWHGACBH006079		√	√						√		√					√			√	√		√	√	√	√
KoWRKY20	GWHGACBH006691	√	√					√			√	√	√	√	√					√	√			√		√	√
KoWRKY21	GWHGACBH006702	√	√	√		√	√			√	√	√	√	√	√	√	√									√
KoWRKY22	GWHGACBH007120	√	√			√						√	√	√						√	√			√	√	√
KoWRKY23	GWHGACBH007304	√	√			√			√	√	√	√	√	√			√
KoWRKY24	GWHGACBH007535	√	√	√	√	√	√					√	√	√							√					√	√
KoWRKY25	GWHGACBH008207	√	√			√		√			√	√	√	√				√		√	√	√	√			√
KoWRKY26	GWHGACBH008472	√	√								√	√	√	√							√		√			√
KoWRKY27	GWHGACBH008891	√	√			√					√	√	√	√			√			√			√	√	√
KoWRKY28	GWHGACBH008978	√	√	√		√		√			√	√						√		√	√		√			√
KoWRKY29	GWHGACBH009250	√	√		√						√	√	√	√			√				√		√			√
KoWRKY30	GWHGACBH009302	√	√		√	√		√				√	√	√			√			√	√	√				√
KoWRKY31	GWHGACBH009474	√	√						√		√	√	√	√		√		√			√		√	√		√	√
KoWRKY32	GWHGACBH009540	√	√			√				√	√	√				√				√	√	√	√			√	√
KoWRKY33	GWHGACBH009550	√	√			√			√		√	√					√			√			√	√	√	√	√
KoWRKY34	GWHGACBH009725	√	√								√		√	√			√			√	√			√		√
KoWRKY35	GWHGACBH010316	√	√	√		√	√	√			√	√	√	√	√	√		√			√				√	√
KoWRKY36	GWHGACBH010385	√	√			√			√		√	√	√	√	√			√		√						√
KoWRKY37	GWHGACBH010420	√	√			√			√	√	√	√	√	√						√						√
KoWRKY38	GWHGACBH010479	√	√			√					√	√			√					√		√
KoWRKY39	GWHGACBH010849	√	√		√		√				√	√	√	√			√	√			√			√		√
KoWRKY40	GWHGACBH011057	√	√								√	√						√					√			√
KoWRKY41	GWHGACBH011286	√	√		√	√		√			√	√			√			√		√						√
KoWRKY42	GWHGACBH012351	√	√	√		√						√				√		√	√	√
KoWRKY43	GWHGACBH012792	√	√				√	√			√	√								√				√	√	√
KoWRKY44	GWHGACBH013356	√	√			√					√	√	√	√			√			√		√	√	√
KoWRKY45	GWHGACBH013438	√	√					√	√		√	√	√	√		√					√		√			√	√
KoWRKY46	GWHGACBH013593	√	√			√		√			√	√					√	√		√	√					√
KoWRKY47	GWHGACBH013762	√	√					√				√	√	√	√	√	√						√			√
KoWRKY48	GWHGACBH013975	√	√	√	√	√			√		√	√	√	√				√		√		√		√
KoWRKY49	GWHGACBH014415	√	√			√		√			√	√						√		√		√	√	√		√
KoWRKY50	GWHGACBH014450		√					√				√	√	√			√	√			√		√	√		√	√
KoWRKY51	GWHGACBH015228	√	√	√		√	√					√	√	√										√
KoWRKY52	GWHGACBH015626	√	√	√					√		√	√	√	√			√									√
KoWRKY53	GWHGACBH016027	√				√				√										√		√	√			√
KoWRKY54	GWHGACBH016181	√	√	√		√	√	√				√	√	√		√		√			√					√
KoWRKY55	GWHGACBH016469	√	√			√					√	√	√	√			√	√								√	√
KoWRKY56	GWHGACBH016668	√	√	√	√	√	√		√		√	√	√	√			√			√	√					√	√
KoWRKY57	GWHGACBH016971	√	√	√		√		√				√	√	√						√	√		√	√		√
KoWRKY58	GWHGACBH017668	√	√			√		√	√		√	√	√	√						√			√
KoWRKY59	GWHGACBH017748	√	√			√						√						√					√			√
KoWRKY60	GWHGACBH017774	√	√		√	√		√			√	√	√	√													√
KoWRKY61	GWHGACBH018126	√	√		√	√					√	√								√	√	√		√		√
KoWRKY62	GWHGACBH018261	√	√								√	√					√						√	√		√
KoWRKY63	GWHGACBH018617	√	√		√	√					√	√	√	√			√								√	√	√
KoWRKY64	GWHGACBH019047	√	√			√	√				√	√	√	√			√	√		√	√		√				√
